# Supplementary material
Source: PubMed Central journal article supplement (PMC5576926)
Supplement: ASN.2016090938SupplementaryData.pdf [file ASN.2016090938SupplementaryData.pdf]

**Table S1. *PKD1* and *PKD2* mutations identified in study patients without apparent family history**

| Family                              | Gene | Sequence Variant  | Codon Change   | Predicted Effect   | Domain        | PKDB  | Polyphen | SIFT | Segregation | Present in Parent |
|-------------------------------------|------|-------------------|----------------|--------------------|---------------|-------|----------|------|-------------|-------------------|
| <i>De Novo Disease</i>              |      |                   |                |                    |               |       |          |      |             |                   |
| <b>TOR254</b>                       | PKD1 | c.11343C>G        | p.Y3781X       | Nonsense           |               | 2x    |          |      |             | No                |
| <b>TOR279</b>                       | PKD1 | c.3628G>T         | p.E1210X       | Nonsense           |               | 1x    |          |      |             | No                |
| <b>TOR303</b>                       | PKD1 | c.11393C>A        | p.Ser3798X     | Nonsense           |               | Novel |          |      |             | No                |
| <b>TOR189</b>                       | PKD1 | c.5887_5888insG   | p.V1963fs26X   | Frameshift         |               | Novel |          |      |             | No                |
| <b>TOR186</b>                       | PKD1 | c.7666C>T         | p.Q2556X       | Nonsense           |               | 7x    |          |      |             | No                |
| <b>TOR253</b>                       | PKD1 | c.2618_2621del4   | p.V873fs23X    | Frameshift         |               | 1x    |          |      |             | No                |
| <b>TOR293</b>                       | PKD1 | c.11378delG       | p.G3792fs33X   | Frameshift         |               | Novel |          |      |             | No                |
| <b>TOR135</b>                       | PKD1 | c.2605delC        | p.R869fs29X    | Frameshift         |               | Novel |          |      |             | No                |
| <b>TOR361</b>                       | PKD1 | c.9957_9958del2   | p.Ser3319fs69X | Frameshift         |               | 1x    |          |      |             | No                |
| <b>TOR403</b>                       | PKD1 | c.5014_5015del2   | p.R1672fs97X   | Frameshift         |               | 13x   |          |      |             | No                |
| <b>TOR271</b>                       | PKD1 | c.1202-9G>A       | Ala401fs       | Atypical Splicing* |               | 1x    |          |      |             | No                |
| <b>TOR241</b>                       | PKD1 | c.1306T>C         | p.C436R        | Missense           | C-lectin      | 1x    | 0.313    | 0    | ++          | No                |
| <b>TOR351</b>                       | PKD1 | c.1367T>C         | p.L456P        | Missense           | C-lectin      | Novel | 0.99     | 0    |             | No                |
| <b>TOR358</b>                       | PKD1 | c.11257C>T        | p.R3753W       | Missense           | Extracellular | 4x    | 0.994    | 0    | ++          | No                |
| <b>TOR130</b>                       | PKD2 | c.2159_2160insA   | p.Asn720fs4X   | Frameshift         |               | Novel |          |      |             | No                |
| <b>TOR257</b>                       | PKD2 | c.1_2907del       | p.Met1fs       | Large Deletion     |               | Novel |          |      |             | No                |
| <i>Indeterminate Family History</i> |      |                   |                |                    |               |       |          |      |             |                   |
| <b>TOR244</b>                       | PKD1 | c.4746G>A         | p.W1582X       | Nonsense           |               | 3x    |          |      |             | Unknown           |
| <b>TOR309</b>                       | PKD1 | c.11766G>A        | p.W3922X       | Nonsense           |               | 3x    |          |      |             | Unknown           |
| <b>TOR328</b>                       | PKD1 | c.10525_10526del2 | E3509fs225X    | Frameshift         |               | Novel |          |      |             | Unknown           |
| <b>TOR329</b>                       | PKD1 | c.2016_2017insG   | p.G672fs40X    | Frameshift         |               | 1x    |          |      |             | Unknown           |
| <b>TOR331</b>                       | PKD1 | c.4042_4043del2   | p.H1347fs82X   | Frameshift         |               | Novel | 0.995    |      |             | Unknown           |
| <b>TOR379</b>                       | PKD1 | c.1674delG        | p.P559FS       | Frameshift         |               | Novel |          |      |             | Unknown           |
| <b>TOR235</b>                       | PKD1 | c.10838T>C        | p.L3613P       | Missense           | Cytoplasmic   | Novel | 0.987    | 0.01 |             | Unknown           |
| <b>TOR256</b>                       | PKD1 | c.5995G>A         | p.G1999S       | Missense           | PKD16         | 2x    | 0.999    | 0.3  | ++          | Unknown           |

|                                              |      |             |          |          |             |       |       |      |    |         |
|----------------------------------------------|------|-------------|----------|----------|-------------|-------|-------|------|----|---------|
| <b>TOR307</b>                                | PKD1 | c.7088T>A   | p.V2363E | Missense | REJ         | 1x    | 0.993 | 0.03 |    | Unknown |
| <b>TOR319</b>                                | PKD1 | c.5809A>G   | p.N1870S | Missense | PKD14       | Novel | 0.999 | 0    |    | Unknown |
| <b>TOR330</b>                                | PKD1 | c.10972A>G; | p.K3658E | Missense | Cytoplasmic | Novel | 0.214 | 0.03 | ++ | Unknown |
| <b>TOR368</b>                                | PKD1 | c.8464G>A   | p.V2822M | Missense | REJ         | 2x    | 0.906 | 0    |    | Unknown |
| <b>TOR219</b>                                | PKD2 | c.2407C>T   | p.R803X  | Nonsense |             | 6x    |       |      |    | Unknown |
| <b>TOR232</b>                                | PKD2 | c.973C>T    | p.R325X  | Nonsense |             | 6x    |       |      |    | Unknown |
| <i>Positive Family History in Retrospect</i> |      |             |          |          |             |       |       |      |    |         |
| <b>TOR323</b>                                | PKD1 | c.4049C>T   | p.T1350M | Missense | PKD8        | 1x    | 0.971 | 0.09 | ++ | Yes     |
| <b>TOR343</b>                                | PKD1 | c.7409C>T   | p.P2470L | Missense | REJ         | Novel | 0.998 | 0.01 | +  | Yes     |
| <b>TOR395</b>                                | PKD1 | c.2695C>G   | p.L899V  | Missense | PKD3        | Novel | 0.784 | 0.02 | +  | Yes     |

\*Presence of atypical splice site was confirmed by rtPCR

**Table S2. Characteristics of study patients with asymmetric polycystic kidney disease\*‡**

| Proband  | Age <sup>a</sup> | Sex | Family History (Y/N) | De novo (Y/N) | Ccr (mL/min) <sup>b</sup> | TKV (mL) | LKV (mL) | RKV (mL) | RKV/LKV | PKD1/2 mutation findings              |
|----------|------------------|-----|----------------------|---------------|---------------------------|----------|----------|----------|---------|---------------------------------------|
| TOR186.1 | 26               | F   | Y                    | N             | 105                       | 784.9    | 238.1    | 546.8    | 2.3     | PKD1: c.7666C>T; p.Q2556X             |
| TOR225.1 | 18               | F   | Y                    | N             | 104                       | 722.0    | 502.4    | 219.6    | 0.4     | PKD1: c.856_862delTCTGGCC; p.S286fs1X |
| TOR320.1 | 26               | F   | Y                    | N             | 101                       | 875.2    | 634.6    | 240.6    | 0.4     | NMD                                   |
| TOR233.1 | 44               | F   | Y                    | N             | 94                        | 801.7    | 634.6    | 167.1    | 0.3     | PKD2: c.567G>A; p.W189X               |
| TOR204.1 | 34               | F   | Y                    | N             | 104                       | 638.1    | 453.5    | 184.6    | 0.4     | PKD2: c.1249C>T; p.R417X              |
| TOR176.1 | 19               | M   | Y                    | N             | 98                        | 506.7    | 148.3    | 358.4    | 2.4     | PKD2: c.595+1G>A; p.Gly199fs          |
| TOR212.1 | 40               | F   | Y                    | N             | 134                       | 1265.6   | 418.1    | 847.5    | 2.0     | PKD2: c.973C>T; p.R325X               |
| TOR216.1 | 53               | F   | Y                    | N             | 84                        | 811.8    | 545.9    | 265.9    | 0.5     | PKD2: c.C1024T; p.R320X               |
| TOR8.1   | 44               | F   | Y                    | N             | 99                        | 552.9    | 379.0    | 173.9    | 0.5     | PKD2: c.2160InsA; p.D724fs4X          |
| TOR350.1 | 68               | M   | Y                    | N             | 79                        | 1019.5   | 715.0    | 304.5    | 0.4     | PKD2: c.2614C>T; p.R872X              |
| TOR184.1 | 55               | M   | Y                    | N             | 116                       | 3632.0   | 3184.5   | 447.5    | 0.1     | NMD                                   |
| TOR135.1 | 53               | F   | N                    | Y             | 73                        | 885.5    | 698.8    | 186.7    | 0.3     | PKD1: c.2605delC; p.R869fs29X         |
| TOR293.1 | 21               | M   | N                    | Y             | 53                        | 1314.6   | 424.9    | 889.7    | 2.1     | PKD1: c.11378delG; p.G3792fs33X       |
| TOR271.1 | 30               | M   | N                    | Y             | 92                        | 1391.0   | 1005.2   | 385.8    | 0.4     | PKD1: c.1202-9G>A; p.A410fs           |
| TOR180.1 | 58               | M   | N                    | Y             | 92                        | 1215.3   | 963.9    | 251.4    | 0.3     | NMD                                   |
| TOR297.1 | 38               | F   | N                    | Y             | 138                       | 635.3    | 164.1    | 471.2    | 2.9     | NMD                                   |
| TOR222.1 | 47               | F   | N                    | Y             | 89                        | 463.0    | 324.2    | 138.8    | 0.4     | NMD                                   |
| TOR368.1 | 72               | M   | IND                  | IND           | 102                       | 245.2    | 182.0    | 63.2     | 0.4     | PKD1: c.8464G>A; p.V2822M             |
| TOR407.1 | 74               | M   | IND                  | IND           | 65                        | 2235.0   | 318.9    | 1916.1   | 6.0     | NMD                                   |
| TOR282.1 | 51               | M   | IND                  | IND           | 154                       | 854.9    | 173.1    | 681.8    | 3.9     | NMD                                   |
| TOR333.1 | 55               | M   | IND                  | IND           | 77                        | 922.9    | 266.2    | 656.7    | 2.5     | NMD                                   |
| TOR349.1 | 57               | M   | IND                  | IND           | 76                        | 2083.9   | 630.9    | 1453     | 2.3     | NMD                                   |

\*Asymmetric PKD is defined as diffuse cystic disease involving one or both kidneys with >50% difference in volume between the two kidneys by CT/MRI, or >50% difference in length between the two kidneys by ultrasound.

<sup>a</sup>Age at MRI or ultrasound; <sup>b</sup>measured creatinine clearance at time of renal imaging.

NMD: no mutation detected; IND: indeterminate.

<sup>‡</sup>The diagnosis of asymmetric PKD in the 23<sup>rd</sup> case (TOR189.1) was based on ultrasound findings: 56 year-old female patient with negative family history, Ccr 46 mL/min, a ratio of left/right kidney length of 2.29, and a *PKD1* mutation (c.5887\_5888InsG; p.V1963FS26X).

**Table S3. Results of *GANAB* mutation screen in 32 mutation-negative cases**

| DNA ID# | Rare <i>GANAB</i> variants             | Alt/Alt+Ref | MAF in 1000G | MAF in ExAC | Damaging calls on SNV by 7 programs |
|---------|----------------------------------------|-------------|--------------|-------------|-------------------------------------|
| 5995    | exon10:c.991C>T:p.R331C (rs1063445)    | 48.439%     | 1.0000%      | 0.8000%     | 6/7                                 |
| 5583    | no mutation found                      |             |              |             |                                     |
| 5506    | no mutation found                      |             |              |             |                                     |
| 5873    | no mutation found                      |             |              |             |                                     |
| 1320    | exon10:c.991C>T:p.R331C (rs1063445)    | 50.932%     | 1.0000%      | 0.8000%     | 6/7                                 |
| 5916    | exon5:c.460C>T:p.R154W                 | 51.003%     | 1.0000%      | 0.4900%     | 1/7                                 |
| 5994    | no mutation found                      |             |              |             |                                     |
| 7002    | exon23:c.2614C>T:p.H872Y (rs114915323) | 48.939%     | 0.8000%      | 0.3000%     | 4/7                                 |
| 5744    | no mutation found                      |             |              |             |                                     |
| 5146    | no mutation found                      |             |              |             |                                     |
| 5560    | no mutation found                      |             |              |             |                                     |
| 5968    | no mutation found                      |             |              |             |                                     |
| 6132    | exon23:c.2614C>T:p.H872Y (rs114915323) | 46.803%     | 0.8000%      | 0.3000%     | 4/7                                 |
| 6045    | no mutation found                      |             |              |             |                                     |
| 5748    | no mutation found                      |             |              |             |                                     |
| 2021    | no mutation found                      |             |              |             |                                     |
| 5577    | no mutation found                      |             |              |             |                                     |
| 5850    | no mutation found                      |             |              |             |                                     |
| 5708    | no mutation found                      |             |              |             |                                     |
| 5524    | no mutation found                      |             |              |             |                                     |
| 5833    | no mutation found                      |             |              |             |                                     |
| 5958    | no mutation found                      |             |              |             |                                     |
| 5517    | no mutation found                      |             |              |             |                                     |
| 6048    | no mutation found                      |             |              |             |                                     |
| 5989    | no mutation found                      |             |              |             |                                     |
| 5510    | no mutation found                      |             |              |             |                                     |
| 5176    | exon10:c.991C>T:p.R331C (rs1063445)    | 48.723%     | 1.0000%      | 0.8000%     | 6/7                                 |
| 5176    | exon3:c.160C>T:p.R54W                  | 52.519%     | NA           | 0.0050%     | 4/7                                 |
| 5586    | no mutation found                      |             |              |             |                                     |
| 6216    | no mutation found                      |             |              |             |                                     |
| 6917    | no mutation found                      |             |              |             |                                     |
| 5767    | no mutation found                      |             |              |             |                                     |
| 5170    | no mutation found                      |             |              |             |                                     |

**TOR186**

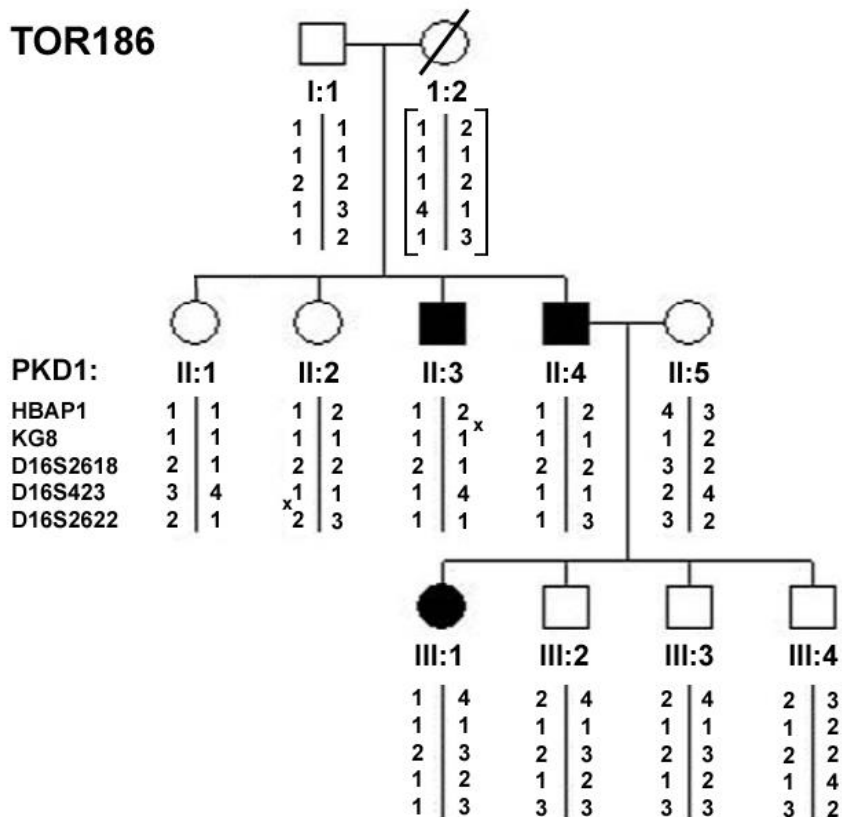

**Figure S1. *PKD1* haplotype analysis of TOR186.** Only one *PKD1* haplotype (1-1-2-1-1) co-segregates with the two affected siblings (II:3, II:4) and the affected daughter (III:1) of II:4, all carrying the *PKD1* (c.7666C>T; p.Q2556X) mutation. This haplotype originated from the unaffected grandfather (I:1) and is also present in one unaffected (II:2) sibling. These data strongly support germline mosaicism in I:1. The location of simple sequence repeat markers relative to *PKD1* are as follows (the number between markers denotes inter-marker distance in cM): HBAP1-2.0-KG8/*PKD1*-0.8-D16S2618-1.2-D16S423-1.3-D16S2622. KG8 is an intragenic marker located within the 3' end of *PKD1*. x denotes inter-marker recombination.
